# Supplementary material for: Volatile Compounds in Citrus Essential Oils: A Comprehensive Review
Source: PubMed Central journal article supplement (PMC6370709; doi:10.3389/fpls.2019.00012), 2019-02-05

**Supplementary Figure 1 (Figure S1).** Chemical structures of the terpenoid compounds identified in all ten most frequently studied *Citrus* species.

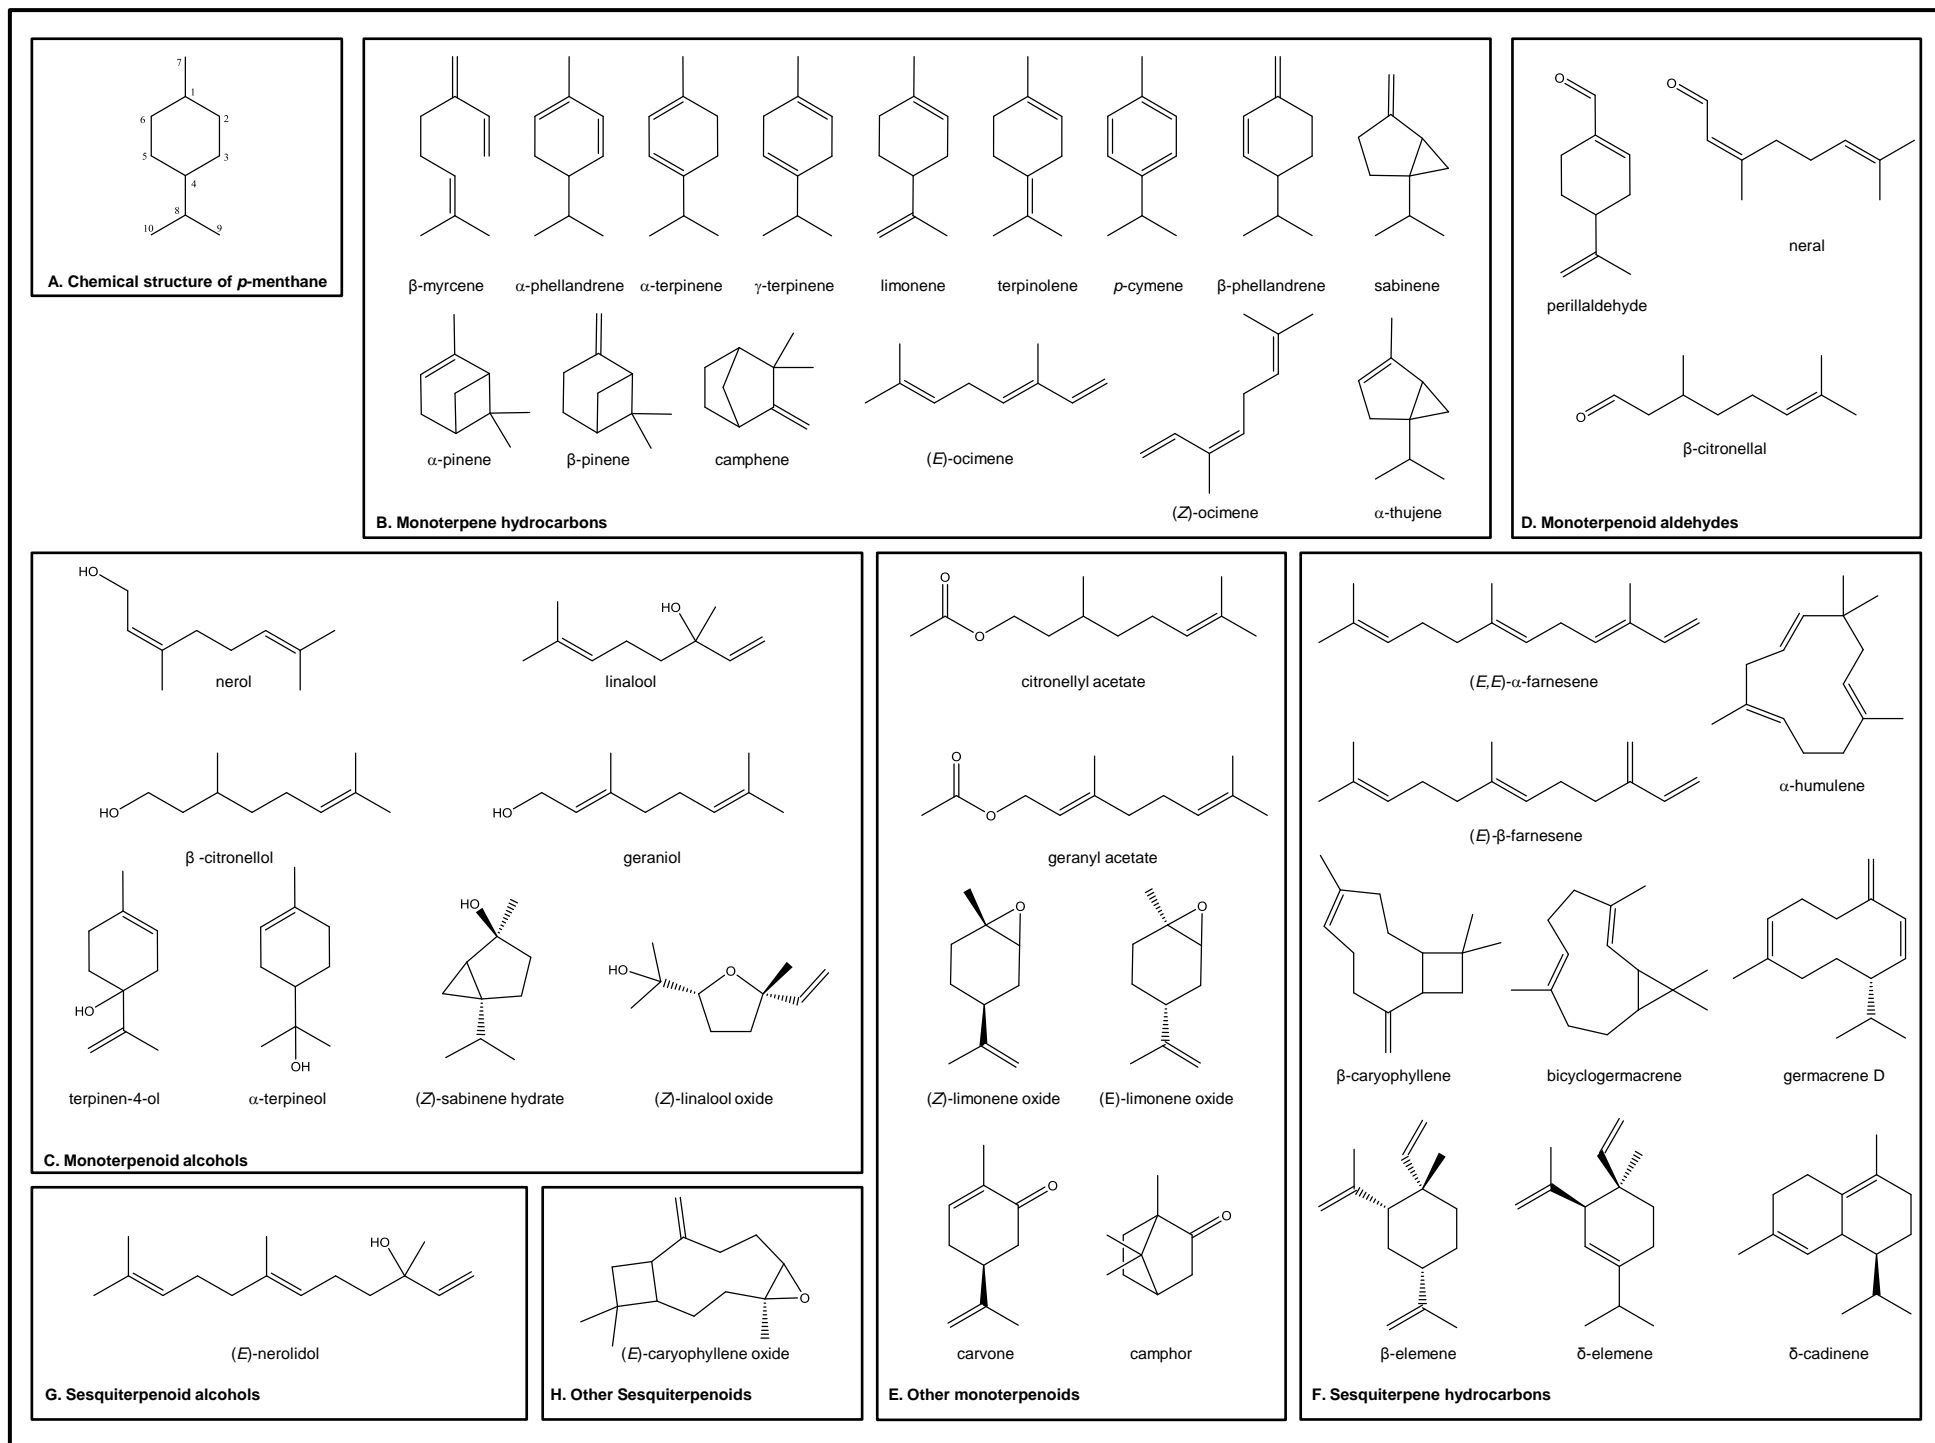

Supplement: Data_Sheet_1.pdf [file Data_Sheet_1.pdf]
