# Supplementary material for: Volatile Compounds in Citrus Essential Oils: A Comprehensive Review
Source: Front Plant Sci. 2019 Feb 5;10:12. doi: 10.3389/fpls.2019.00012 (PMC6370709; doi:10.3389/fpls.2019.00012)
Supplement: Supplementary file 3 [file Table_3.XLSX]

## Sheet: Table S3
Supplementary Table 3 (Table S3). Volatile compounds exclusively reported in only one of the ten most frequently studied Citrus species.
Compound	Classification according to Supplementary Table 2	Classification in Figure 1
Exclusively identified in C. reticulata
a-myrcene	Hydrocarbon monoterpene	Hydrocarbon monoterpene
b-citronellene	Hydrocarbon monoterpene	Hydrocarbon monoterpene
2,5-dimethyl-3-methylene-1,5-heptadiene	Hydrocarbon monoterpene	Hydrocarbon monoterpene
p-mentha-1,5,8-triene	Hydrocarbon monoterpene	Hydrocarbon monoterpene
menthol	Monoterpene alcohol	Monoterpenoid alcohol
E-verbenyl acetate	Monoterpene ester	Monoterpenoid ester
3(10)-caren-4-ol acetoacetic acid ester	Monoterpene ester	Monoterpenoid ester
winelactone	Monoterpene ester	Monoterpenoid ester
pulegone	Monoterpene ketone	Other oxygenated monoterpenoid
umbellulone	Monoterpene ketone	Other oxygenated monoterpenoid
longipinene	Hydrocarbon sesquiterpene	Hydrocarbon sesquiterpene
aristolediene	Hydrocarbon sesquiterpene	Hydrocarbon sesquiterpene
E,Z-farnesol	Sesquiterpene alcohol	Sesquiterpenoid alcohol
selina-6-en-4-ol	Sesquiterpene alcohol	Sesquiterpenoid alcohol
epiglobulol	Sesquiterpene alcohol	Sesquiterpenoid alcohol
Z-patchenol	Sesquiterpene alcohol	Sesquiterpenoid alcohol
Z-α-santalol	Sesquiterpene alcohol	Sesquiterpenoid alcohol
isophytol	Other terpenoid (alcohol)	Other terpenoid
phytone	Other terpenoid (ketone)	Other terpenoid
1,4-pentadiene	Non-terpene aliphatic hydrocarbon	Non-terpenoid hydrocarbon
1,5,5-trimethyl-3-methylenecyclohexene	Non-terpene aliphatic hydrocarbon	Non-terpenoid hydrocarbon
5-(2-methylpropyl)nonane	Non-terpene aliphatic hydrocarbon	Non-terpenoid hydrocarbon
bicyclo[7.1.0]decane	Non-terpene aliphatic hydrocarbon	Non-terpenoid hydrocarbon
4-undecene	Non-terpene aliphatic hydrocarbon	Non-terpenoid hydrocarbon
n-tridecanol	Non-terpene aliphatic hydrocarbon	Non-terpenoid hydrocarbon
docosane	Non-terpene aliphatic hydrocarbon	Non-terpenoid hydrocarbon
o-xylene	Non-terpene aromatic hydrocarbon	Non-terpenoid hydrocarbon
p-xylene	Non-terpene aromatic hydrocarbon	Non-terpenoid hydrocarbon
E-anethole	Non-terpene aromatic hydrocarbon	Non-terpenoid hydrocarbon
benzocyclobutene	Non-terpene aromatic hydrocarbon	Non-terpenoid hydrocarbon
naphtalene	Non-terpene aromatic hydrocarbon	Non-terpenoid hydrocarbon
styrene	Non-terpene aromatic hydrocarbon	Non-terpenoid hydrocarbon
2-tridecen-1-ol	Non-terpenoid aliphatic alcohol	Non-terpenoid alcohol
tetradecanol	Non-terpenoid aliphatic alcohol	Non-terpenoid alcohol
2-methyl-Z,Z-3,13-octadecadienol	Non-terpenoid aliphatic alcohol	Non-terpenoid alcohol
butylated hydroxytoluene	Non-terpenoid aromatic hydrocarbon	Other non-terpene
1-heneicosyl formate	Non-terpenoid aliphatic ester	Non-terpenoid ester
sotolon	Non-terpenoid aliphatic ester	Non-terpenoid ester
E,E-2,4-heptadienal	Non-terpenoid aliphatic aldehyde	Non-terpenoid aldehyde
Z-6-nonenal	Non-terpenoid aliphatic aldehyde	Non-terpenoid aldehyde
E,E-2,4-nonadienal	Non-terpenoid aliphatic aldehyde	Non-terpenoid aldehyde
2E,4E,7Z-decatrienal	Non-terpenoid aliphatic aldehyde	Non-terpenoid aldehyde
Z-trimenal	Non-terpenoid aliphatic aldehyde	Non-terpenoid aldehyde
Z-4-undecenal	Non-terpenoid aliphatic aldehyde	Non-terpenoid aldehyde
Z-2-dodecenal	Non-terpenoid aliphatic aldehyde	Non-terpenoid aldehyde
3-dodecenal	Non-terpenoid aliphatic aldehyde	Non-terpenoid aldehyde
Z,E-2,6-dodecadienal	Non-terpenoid aliphatic aldehyde	Non-terpenoid aldehyde
Z-6-tridecenal	Non-terpenoid aliphatic aldehyde	Non-terpenoid aldehyde
Z-2-tetradecenal	Non-terpenoid aliphatic aldehyde	Non-terpenoid aldehyde
Z-5-tetradecenal	Non-terpenoid aliphatic aldehyde	Non-terpenoid aldehyde
Z-6-tetradecenal	Non-terpenoid aliphatic aldehyde	Non-terpenoid aldehyde
E-2-hexadecenal	Non-terpenoid aliphatic aldehyde	Non-terpenoid aldehyde
Z-1,5-octadien-3-one	Non-terpenoid aliphatic ketone	Non-terpenoid ketone
ethanone 1-(4-ethylphenyl)	Non-terpenoid aromatic ketone	Other non-terpene
9-hexadecenoic acid	Non-terpenoid aliphatic acid	Other non-terpene
5-methyl-2-furfural	Non-terpenoid aromatic furan	Other non-terpene
dimethyl anthranilate	Non-terpenoid nitrogenous (and aromatic ester) compound	Other non-terpene
Exclusively identified in C. grandis
1,2-epoxylinalool	Monoterpene alcohol	Monoterpenoid alcohol
chrysanthemol	Monoterpene alcohol	Monoterpenoid alcohol
E-verbenol	Monoterpene alcohol	Monoterpenoid alcohol
geranyl 2-methyl-2-butenoate	Monoterpene ester	Monoterpenoid ester
b-bourbonene	Sesquiterpene hydrocarbon	Sesquiterpene hydrocarbon
α-panasinsen	Sesquiterpene hydrocarbon	Sesquiterpene hydrocarbon
7-epi-bicyclosesquiphellandrene	Sesquiterpene hydrocarbon	Sesquiterpene hydrocarbon
α-calacorene	Sesquiterpene hydrocarbon	Sesquiterpene hydrocarbon
Z,Z-farnesyl acetate	Sesquiterpene ester	Other oxygenated sesquiterpene
E,Z-1,5-cyclodecadiene	Non-terpene aliphatic hydrocarbon	Non-terpenoid hydrocarbon
isoeugenyl methyl ether	Non-terpenoid aromatic ether	Other non-terpene
4-methyl-1-pentanol	Non-terpenoid aliphatic alcohol	Non-terpenoid alcohol
2-phenylethanol	Non-terpene aromatic alcohol	Non-terpenoid alcohol
3-ethylphenol	Non-terpene aromatic alcohol	Non-terpenoid alcohol
methyl acetate	Non-terpene aliphatic ester	Non-terpenoid ester
isooctyl acetate	Non-terpene aliphatic ester	Non-terpenoid ester
hexyl 3-methylbutanoate	Non-terpene aliphatic ester	Non-terpenoid ester
butyl octanoate	Non-terpene aliphatic ester	Non-terpenoid ester
heptyl octanoate	Non-terpene aliphatic ester	Non-terpenoid ester
hexadecyl octanoate	Non-terpene aliphatic ester	Non-terpenoid ester
methyl benzoate	Non-terpene aromatic ester	Non-terpenoid ester
E-2-heptenal	Non-terpene aliphatic aldehyde	Non-terpenoid aldehyde
6-octenal	Non-terpene aliphatic aldehyde	Non-terpenoid aldehyde
2,6-octadienal	Non-terpene aliphatic aldehyde	Non-terpenoid aldehyde
Z,E-2,6-nonadienal	Non-terpene aliphatic aldehyde	Non-terpenoid aldehyde
acetone	Non-terpene aliphatic ketone	Non-terpenoid ketone
hexadecyl oxirane	Non-terpene aliphatic ketone	Non-terpenoid ketone
oleic acid	Non-terpenoid aliphatic acid	Other non-terpene
2-methylfuran	Non-terpenoid aromatic furan	Other non-terpene
ethyl anthranilate	Non-terpenoid nitrogenous (and aromatic ester) compound	Other non-terpene
dimethyl sulfide	Non-terpenoid sulfur compound	Other non-terpene
benzothiazole	Non-terpenoid sulfur compound	Other non-terpene
Exclusively identified in C. sinensis
2,6-dimethyl-2,6-octadiene	Hydrocarbon monoterpene	Hydrocarbon monoterpene
b-thujene	Hydrocarbon monoterpene	Hydrocarbon monoterpene
dehydrolinalool	Monoterpene alcohol	Monoterpenoid alcohol
myrcenol	Monoterpene alcohol	Monoterpenoid alcohol
5-isopropenyl-2-methyl-7-oxabicyclo[4.1.0]heptan-2-ol	Monoterpene alcohol	Monoterpenoid alcohol
geranyl formate	Monoterpene ester	Monoterpenoid ester
propanoic acid, 2-methyl-, 5-methyl-2- (1-methylethyl) phenyl ester	Monoterpene ester	Monoterpenoid ester
artemiseole	Monoterpene ether	Other oxygenated monoterpene
E-rose oxide	Monoterpene ether	Other oxygenated monoterpene
sativene	Hydrocarbon sesquiterpene	Hydrocarbon sesquiterpene
isolongifolene	Hydrocarbon sesquiterpene	Hydrocarbon sesquiterpene
viridiflorene	Hydrocarbon sesquiterpene	Hydrocarbon sesquiterpene
E-b-guaiene	Hydrocarbon sesquiterpene	Hydrocarbon sesquiterpene
cyperene	Hydrocarbon sesquiterpene	Hydrocarbon sesquiterpene
valerianol	Sesquiterpene alcohol	Sesquiterpenoid alcohol
viridiflorol	Sesquiterpene alcohol	Sesquiterpenoid alcohol
4-epi-cubebol	Sesquiterpene alcohol	Sesquiterpenoid alcohol
bisabol-1-one	Sesquiterpene ketone	Other oxygenated sesquiterpene
2-ethenyl-1,3,3-trimethylcyclohexene	Non-terpene aliphatic hydrocarbon	Non-terpenoid hydrocarbon
octadecane	Non-terpene aliphatic hydrocarbon	Non-terpenoid hydrocarbon
3-cyclohexene-1-methanol	Non-terpenoid aliphatic alcohol	Non-terpenoid alcohol
1-vinyl-1-cyclohexenol	Non-terpenoid aliphatic alcohol	Non-terpenoid alcohol
E-2-undecenol	Non-terpenoid aliphatic alcohol	Non-terpenoid alcohol
2-ethoxyethyl acetate	Non-terpenoid aliphatic ester	Non-terpenoid ester
ethyl butanoate	Non-terpenoid aliphatic ester	Non-terpenoid ester
isopropylhexadecanaote	Non-terpenoid aliphatic ester	Non-terpenoid ester
3-methyl-2-cyclopenten-1-one	Non-terpenoid aliphatic ketone	Non-terpenoid ketone
2-hydroxy-3-methyl-2-cyclopenten-1-one	Non-terpenoid aliphatic ketone	Non-terpenoid ketone
methylheptenone	Non-terpenoid aliphatic ketone	Non-terpenoid ketone
1,4,7,10-tetraoxa-cyclodecane	Non-terpenoid aliphatic ketone	Non-terpenoid ketone
1,4,7,10,13-pentaoxa-cyclopentadecane	Non-terpenoid aliphatic ketone	Non-terpenoid ketone
1,4,7,10,13,16-hexaoxa-cyclooctadecane	Non-terpenoid aliphatic ketone	Non-terpenoid ketone
Exclusively identified in C. paradisi
Z,E-a-farnesene	Hydrocarbon sesquiterpene	Hydrocarbon sesquiterpene
cyclosativene	Hydrocarbon sesquiterpene	Hydrocarbon sesquiterpene
iso-italicene	Hydrocarbon sesquiterpene	Hydrocarbon sesquiterpene
4-methyl-1-octene	Non-terpene aliphatic hydrocarbon	Non-terpenoid hydrocarbon
cinnamaldehyde	Non-terpenoid aromatic aldehyde	Other non-terpene
Exclusively identified in C. aurantium
Z-a-ocimene	Hydrocarbon monoterpene	Hydrocarbon monoterpene
isomenthol	Monoterpene alcohol	Monoterpenoid alcohol
terpinen-4-yl acetate	Monoterpene ester	Monoterpenoid ester
7-epi-α-selinen-2-one	Sesquiterpene ketone	Other oxygenated sesquiterpene
ethyl benzoate	Non-terpenoid aromatic ester	Other non-terpene
5-methylidene-2,3,3a,4,6,6a-hexahydropentalen-1-one	Non-terpenoid aliphatic ketone	Non-terpenoid ketone
Exclusively identified in C. junos
1,4,8-menthatriene	Hydrocarbon monoterpene	Hydrocarbon monoterpene
p-mentha-1,5-dien-8-ol	Monoterpene alcohol	Monoterpenoid alcohol
p-mentha-1(7),2-dien-8-ol	Monoterpene alcohol	Monoterpenoid alcohol
geranyl butanoate	Monoterpene ester	Monoterpenoid ester
b-zingiberene	Hydrocarbon sesquiterpene	Hydrocarbon sesquiterpene
d-muurolene	Hydrocarbon sesquiterpene	Hydrocarbon sesquiterpene
6,7-germacradien-1-ol	Sesquiterpene alcohol	Sesquiterpenoid alcohol
ledol	Sesquiterpene alcohol	Sesquiterpenoid alcohol
cedryl acetate	Sesquiterpene ester	Other oxygenated sesquiterpene
Z-caryophyllene epoxide	Sesquiterpene epoxide	Other oxygenated sesquiterpene
3E,5Z-undeca-1,3,5-triene	Non-terpene aliphatic hydrocarbon	Non-terpenoid hydrocarbon
1,3E,5Z,8Z-undeca-1,3,5,8-tetraene	Non-terpene aliphatic hydrocarbon	Non-terpenoid hydrocarbon
butanol	Non-terpenoid aliphatic alcohol	Non-terpenoid alcohol
6-methyl-5-hepten-2-ol	Non-terpenoid aliphatic alcohol	Non-terpenoid alcohol
6Z,8E-undeca-6,8,10-trien-3-ol	Non-terpenoid aliphatic alcohol	Non-terpenoid alcohol
6E,8E-undeca-6,8,10-trien-3-ol	Non-terpenoid aliphatic alcohol	Non-terpenoid alcohol
6Z,8E-undeca-6,8,10-trien-4-ol or yuzuol	Non-terpenoid aliphatic alcohol	Non-terpenoid alcohol
6E,8E-undeca-6,8,10-trien-4-ol	Non-terpenoid aliphatic alcohol	Non-terpenoid alcohol
hydrocinnamic alcohol	Non-terpenoid aromatic alcohol	Other non-terpene
isoeugenol	Non-terpenoid aromatic alcohol	Other non-terpene
ethyl formate	Non-terpenoid aliphatic ester	Non-terpenoid ester
1-heptenyl acetate	Non-terpenoid aliphatic ester	Non-terpenoid ester
yuzu lactone	Non-terpenoid aliphatic ester	Non-terpenoid ester
E-6-nonenal	Non-terpenoid aliphatic aldehyde	Non-terpenoid aldehyde
E-4-decenal	Non-terpenoid aliphatic aldehyde	Non-terpenoid aldehyde
Z-4,5-epoxy-E-2-decenal	Non-terpenoid aliphatic aldehyde	Non-terpenoid aldehyde
2E,7Z-E-4,5-epoxydeca-2,7-dienal	Non-terpenoid aliphatic aldehyde	Non-terpenoid aldehyde
4-hydroxy-2,5-dimethyl-3-(2H)-furanone	Non-terpenoid aliphatic ketone	Non-terpenoid ketone
yuzunone	Non-terpenoid aliphatic ketone	Non-terpenoid ketone
6E,8E-undeca-6,8,10-trien-3-one	Non-terpenoid aliphatic ketone	Non-terpenoid ketone
naphtalenone	Non-terpenoid aromatic ketone	Non-terpenoid ketone
butanoic acid	Non-terpenoid aliphatic acid	Other non-terpene
E-4-methyl-3-hexenoic acid	Non-terpenoid aliphatic acid	Other non-terpene
methyl trisulfide	Non-terpenoid sulfur compound	Other non-terpene
4-methyl-4-mercapto-2-pentanone	Non-terpenoid sulfur compound	Other non-terpene
Exclusively identified in C. medica
2-methyl-6-methylen-2-octene	Hydrocarbon monoterpene	Hydrocarbon monoterpene
neo iso- isopulegol	Monoterpene alcohol	Monoterpenoid alcohol
p-cymene-7-ol	Monoterpene alcohol	Monoterpenoid alcohol
Z-ocimenone	Monoterpene ketone	Other oxygenated monoterpene
dehydro sabina ketone	Monoterpene ketone	Other oxygenated monoterpene
β-thujone	Monoterpene ketone	Other oxygenated monoterpene
Z-4-caranone	Monoterpene ketone	Other oxygenated monoterpene
E-4-caranone	Monoterpene ketone	Other oxygenated monoterpene
E,Z-a-farnesene	Hydrocarbon sesquiterpene	Hydrocarbon sesquiterpene
a-cuprenene	Hydrocarbon sesquiterpene	Hydrocarbon sesquiterpene
γ-cuprenene	Hydrocarbon sesquiterpene	Hydrocarbon sesquiterpene
aristolochene	Hydrocarbon sesquiterpene	Hydrocarbon sesquiterpene
δ-amorphene	Hydrocarbon sesquiterpene	Hydrocarbon sesquiterpene
γ-gurjunene	Hydrocarbon sesquiterpene	Hydrocarbon sesquiterpene
β-acoradiene	Hydrocarbon sesquiterpene	Hydrocarbon sesquiterpene
β-patchoulene	Hydrocarbon sesquiterpene	Hydrocarbon sesquiterpene
duprezianene	Hydrocarbon sesquiterpene	Hydrocarbon sesquiterpene
epi-alpha-muurolol	Sesquiterpene alcohol	Sesquiterpenoid alcohol
nootkatol	Sesquiterpene alcohol	Sesquiterpenoid alcohol
eremoligenol	Sesquiterpene alcohol	Sesquiterpenoid alcohol
selin-7(11)-en-4-ol	Sesquiterpene alcohol	Sesquiterpenoid alcohol
pogostol	Sesquiterpene alcohol	Sesquiterpenoid alcohol
guaiol	Sesquiterpene alcohol	Sesquiterpenoid alcohol
(Z)-α-trans-bergamotol	Sesquiterpene alcohol	Sesquiterpenoid alcohol
β-oplopenone	Sesquiterpene ketone	Other oxygenated sesquiterpene
1,3-cyclopentadiene	Non-terpene aliphatic hydrocarbon	Non-terpenoid hydrocarbon
methyl chavicol	Non-terpenoid aromatic ether	Other non-terpene
2-decanol	Non-terpenoid aliphatic alcohol	Non-terpenoid alcohol
10-undecenal	Non-terpenoid aliphatic aldehyde	Non-terpenoid aldehyde
Exclusively identified in C. aurantifolia
thuja-2,4 (10)-diene	Hydrocarbon monoterpene	Hydrocarbon monoterpene
terpinen-1-ol	Monoterpene alcohol	Monoterpenoid alcohol
exo-isocitral	Monoterpene aldehyde	Other oxygenated monoterpene
limonenal	Monoterpene aldehyde	Other oxygenated monoterpene
isopinocamphone	Monoterpene ketone	Other oxygenated monoterpene
3,4-dehydrocineole	Monoterpene ether	Other oxygenated monoterpene
2,2-dimethyl-5-(1-methyl-1-propenyl)-tetrahydrofuran	Monoterpene ether	Other oxygenated monoterpene
a-elemene	Hydrocarbon sesquiterpene	Hydrocarbon sesquiterpene
α-barbatene	Hydrocarbon sesquiterpene	Hydrocarbon sesquiterpene
selin-11-en-4-α-ol	Sesquiterpene alcohol	Sesquiterpenoid alcohol
cedrenol	Sesquiterpene alcohol	Sesquiterpenoid alcohol
santal-10-en-2-ol	Sesquiterpene alcohol	Sesquiterpenoid alcohol
decane	Non-terpene aliphatic hydrocarbon	Non-terpenoid hydrocarbon
Exclusively identified in C. bergamia
d-terpinene	Hydrocarbon monoterpene	Hydrocarbon monoterpene
Z-sabinene hydrate acetate	Monoterpene ester	Monoterpenoid ester
E-sabinene hydrate acetate	Monoterpene ester	Monoterpenoid ester
epi-b-bisabolol	Sesquiterpene alcohol	Sesquiterpenoid alcohol
Z-sesquisabinene hydrate	Sesquiterpene alcohol	Sesquiterpenoid alcohol
Exclusively identified in C. limon
p-menth-1-ene	Hydrocarbon monoterpene	Hydrocarbon monoterpene
1,2-dihydrolinalool	Monoterpene alcohol	Monoterpenoid alcohol
isogeraniol	Monoterpene alcohol	Monoterpenoid alcohol
δ-terpineol	Monoterpene alcohol	Monoterpenoid alcohol
(5β,7β,10β)-3,11-eudesmadien-2-one	Sesquiterpene ketone	Other oxygenated sesquiterpene
1,3,3-trimethylcyclohexene	Non-terpene aliphatic hydrocarbon	Non-terpenoid hydrocarbon
1-dodecene	Non-terpene aliphatic hydrocarbon	Non-terpenoid hydrocarbon
1-hexadecene	Non-terpene aliphatic hydrocarbon	Non-terpenoid hydrocarbon
1-methyl-4-(1-methylethyl)-3 cyclohexene-1-acetaldehyde	Sesquiterpene aldehyde	Other oxygenated sesquiterpene
1-pentadecene	Non-terpene aliphatic hydrocarbon	Non-terpenoid hydrocarbon
1-tridecene	Non-terpene aliphatic hydrocarbon	Non-terpenoid hydrocarbon
2-(2-methyltetrahydrothiophen-2-yl)ethyl acetate	Non-terpenoid sulfur (and ester) compound	Other non-terpene
2-(5-isopropyl-2-methyltetrahydrothiophen-2-yl) ethyl acetate	Other terpenoid (sulfur monoterpene)	Other terpenoid
2-(5-isopropyl-2-methyltetrahydrothiophen-2-yl)ethanol	Other terpenoid (sulfur monoterpene)	Other terpenoid
2-(5-isopropylidene-2-methyltetrahydrothiophen-2-yl) ethyl acetate	Other terpenoid (sulfur monoterpene)	Other terpenoid
2,3-dehydro-1,8-cineole	Monoterpene ether	Other oxygenated monoterpene
2,3-dihydrotoluene	Non-terpene aromatic hydrocarbon	Non-terpenoid hydrocarbon
2,3-epoxygeranial	Monoterpene aldehyde	Other oxygenated monoterpene
2,3-octanedione	Non-terpenoid aliphatic ketone	Non-terpenoid ketone
2,5,5-trimethyl-2-cyclohexenone	Non-terpenoid aliphatic ketone	Non-terpenoid ketone
2,6-dimethoxy-4-vinylphenol	Non-terpenoid aromatic alcohol	Non-terpenoid alcohol
2-[5-(1-hydroxy-1-methylethyl)2-methyltetrahydrothiophen-2-yl] ethyl acetate	Other terpenoid (sulfur monoterpene)	Other terpenoid
2-decanone	Non-terpenoid aliphatic ketone	Non-terpenoid ketone
2-dodecanone	Non-terpenoid aliphatic ketone	Non-terpenoid ketone
2-ethyl hexanol	Non-terpenoid aliphatic alcohol	Non-terpenoid alcohol
2-ethylhexanal	Non-terpenoid aliphatic aldehyde	Non-terpenoid aldehyde
2-heptanone	Non-terpenoid aliphatic ketone	Non-terpenoid ketone
2-hexanol	Non-terpenoid aliphatic alcohol	Non-terpenoid alcohol
2-hexanone	Non-terpenoid aliphatic ketone	Non-terpenoid ketone
2-methyl-(E)-2-octenal	Non-terpenoid aliphatic aldehyde	Non-terpenoid aldehyde
2-methyl-6-methylen-2,7-octadienal	Monoterpene aldehyde	Other oxygenated monoterpene
2-methylbutanol	Non-terpenoid aliphatic alcohol	Non-terpenoid alcohol
2-methylbutyl acetate	Non-terpenoid aliphatic ester (lactone)	Non-terpenoid ester
2-methyldecanal	Non-terpenoid aliphatic aldehyde	Non-terpenoid aldehyde
2-methyldodecanal	Non-terpenoid aliphatic aldehyde	Non-terpenoid aldehyde
2-methyl-E-2-heptenal	Non-terpenoid aliphatic aldehyde	Non-terpenoid aldehyde
2-methyl-E-2-tridecenal	Non-terpenoid aliphatic aldehyde	Non-terpenoid aldehyde
2-methyl-E-2-undecenal	Non-terpenoid aliphatic aldehyde	Non-terpenoid aldehyde
2-methylenehexanal	Non-terpenoid aliphatic aldehyde	Non-terpenoid aldehyde
2-methylheptanal	Non-terpenoid aliphatic aldehyde	Non-terpenoid aldehyde
2-methylnonanal	Non-terpenoid aliphatic aldehyde	Non-terpenoid aldehyde
2-methyloctanal	Non-terpenoid aliphatic aldehyde	Non-terpenoid aldehyde
2-methyltridecanal	Non-terpenoid aliphatic aldehyde	Non-terpenoid aldehyde
2-methylundecanal	Non-terpenoid aliphatic aldehyde	Non-terpenoid aldehyde
2-nonanone	Non-terpenoid aliphatic ketone	Non-terpenoid ketone
2-pentadecanone	Non-terpenoid aliphatic ketone	Non-terpenoid ketone
2-propionylthiophene	Non-terpenoid sulfur compound	Other non-terpene
2-tetradecanone	Non-terpenoid aliphatic ketone	Non-terpenoid ketone
2-tridecanone	Non-terpenoid aliphatic ketone	Non-terpenoid ketone
2-undecanone	Non-terpenoid aliphatic ketone	Non-terpenoid ketone
3,4- dimethylphenol	Non-terpenoid aromatic alcohol	Non-terpenoid alcohol
3,5,5-trimethyl-2-cyclohexene-1,4-dione	Non-terpenoid aliphatic ketone	Non-terpenoid ketone
3-decanone	Non-terpenoid aliphatic ketone	Non-terpenoid ketone
3-hexanol	Non-terpenoid aliphatic alcohol	Non-terpenoid alcohol
3-hexanone	Non-terpenoid aliphatic ketone	Non-terpenoid ketone
3-mercapto-3,7-dimethyl-6-octenyl acetate	Other terpenoid (sulfur monoterpene)	Other terpenoid
3-methylbenzaldehyde	Non-terpenoid aromatic aldehyde	Non-terpenoid aldehyde
3-methylbutanol	Non-terpenoid aliphatic alcohol	Non-terpenoid alcohol
3-methyldodecanal	Non-terpenoid aliphatic aldehyde	Non-terpenoid aldehyde
3-methylundecanal	Non-terpenoid aliphatic aldehyde	Non-terpenoid aldehyde
3-octenyl acetate	Non-terpenoid aliphatic ester	Non-terpenoid ester
3-tridecanone	Non-terpenoid aliphatic ketone	Non-terpenoid ketone
3-undecanone	Non-terpenoid aliphatic ketone	Non-terpenoid ketone
4,7-dimethyl-bicyclo[3.2.1]oct-3-en-6-one	Monoterpene ketone	Other oxygenated monoterpene
4-acetyl-1-methyl-1-cyclohexene	Other terpenoid	Other terpenoid
4-dodecanone	Non-terpenoid aliphatic ketone	Non-terpenoid ketone
4-methyl-5-(3-methylbut-2-en-1-yl)-2(5H)-furanone	Non-terpenoid aliphatic ester (lactone)	Non-terpenoid ester
4-methyldecanal	Non-terpenoid aliphatic aldehyde	Non-terpenoid aldehyde
4-methyldodecanal	Non-terpenoid aliphatic aldehyde	Non-terpenoid aldehyde
4-methylhexyl acetate	Non-terpenoid aliphatic ester	Non-terpenoid ester
4-methylnonanal	Non-terpenoid aliphatic aldehyde	Non-terpenoid aldehyde
4-methylnonanol	Non-terpenoid aliphatic alcohol	Non-terpenoid alcohol
4-methyloctanal	Non-terpenoid aliphatic aldehyde	Non-terpenoid aldehyde
4-methylpentyl acetate	Non-terpenoid aliphatic ester	Non-terpenoid ester
4-methyltridecanal	Non-terpenoid aliphatic aldehyde	Non-terpenoid aldehyde
4-methylundecanal	Non-terpenoid aliphatic aldehyde	Non-terpenoid aldehyde
4-octanone	Non-terpenoid aliphatic ketone	Non-terpenoid ketone
5-dodecenyl acetate	Non-terpenoid aliphatic ester	Non-terpenoid ester
6,7-epoxygeranial	Monoterpene aldehyde	Other oxygenated monoterpene
6,7-epoxyneral	Monoterpene aldehyde	Other oxygenated monoterpene
6-dodecanone	Non-terpenoid aliphatic ketone	Non-terpenoid ketone
6-methyldecanal	Non-terpenoid aliphatic aldehyde	Non-terpenoid aldehyde
6-methylheptanal	Non-terpenoid aliphatic aldehyde	Non-terpenoid aldehyde
6-methylnonanal	Non-terpenoid aliphatic aldehyde	Non-terpenoid aldehyde
7-methyl-3-methylene-6-octenal	Non-terpenoid aliphatic aldehyde	Non-terpenoid aldehyde
8-methyldecanal	Non-terpenoid aliphatic aldehyde	Non-terpenoid aldehyde
acetaldehyde	Non-terpenoid aliphatic aldehyde	Non-terpenoid aldehyde
acetophenone	Non-terpenoid aromatic ketone	Non-terpenoid ketone
a-curcumene	Hydrocarbon sesquiterpene	Hydrocarbon sesquiterpene
anethofuran	Monoterpene ether	Other oxygenated monoterpene
ascaridole	Monoterpene hydroperoxide	Other oxygenated monoterpene
ascaridole epoxide	Monoterpene epoxide	Other oxygenated monoterpene
b-bisabolenal	Sesquiterpene aldehyde	Other oxygenated sesquiterpene
b-bisabolol	Sesquiterpene alcohol	Sesquiterpenoid alcohol
b-ionone-2,3-epoxide	Apocarotenoid	Other terpenoid
bourbonol	Sesquiterpene alcohol	Sesquiterpenoid alcohol
butyl hexanoate	Non-terpenoid aliphatic ester	Non-terpenoid ester
carvotanacetone	Monoterpene ketone	Other oxygenated monoterpene
caryophyllenol	Sesquiterpene alcohol	Sesquiterpenoid alcohol
chrysanthenol	Monoterpene alcohol	Monoterpenoid alcohol
cuminyl acetate	Monoterpene ester	Monoterpenoid ester
decyl propanoate	Non-terpenoid aliphatic ester	Non-terpenoid ester
dehydrolinalool oxide	Monoterpene ether	Other oxygenated monoterpene
dihydroactinidiolide	Other terpenoid (lactone)	Other terpenoid
dihydrotagetone	Monoterpene ketone	Other oxygenated monoterpene
dillapiole	Non-terpenoid aromatic benzodioxole	Other non-terpene
E-1,2-dihydroperilla alcohol	Monoterpene alcohol	Monoterpenoid alcohol
E-1,2-dihydroperillaldehyde	Monoterpene aldehyde	Other oxygenated monoterpene
E-2-decenol	Non-terpenoid aliphatic alcohol	Non-terpenoid alcohol
E-2-hexenyl hexanoate	Non-terpenoid aliphatic ester	Non-terpenoid ester
E-2-methyl-2-nonenal	Non-terpenoid aliphatic aldehyde	Non-terpenoid aldehyde
E-2-nonenol	Non-terpenoid aliphatic alcohol	Non-terpenoid alcohol
E-2-pinanol	Monoterpene alcohol	Monoterpenoid alcohol
E-4-tetradecenal	Non-terpenoid aliphatic aldehyde	Non-terpenoid aldehyde
E-9-octadecenal	Non-terpenoid aliphatic aldehyde	Non-terpenoid aldehyde
E-limonene-8,9-epoxide	Monoterpene epoxide	Other oxygenated monoterpene
E-sesquisabinene hydrate	Sesquiterpene alcohol	Sesquiterpenoid alcohol
ethyl decanoate	Non-terpenoid aliphatic ester	Non-terpenoid ester
ethyl dodecanoate	Non-terpenoid aliphatic ester	Non-terpenoid ester
ethyl linolenate	Non-terpenoid aliphatic ester	Non-terpenoid ester
ethyl pentadecanoate	Non-terpenoid aliphatic ester	Non-terpenoid ester
ethyl propanoate	Non-terpenoid aliphatic ester	Non-terpenoid ester
ethyl tetradecanoate	Non-terpenoid aliphatic ester	Non-terpenoid ester
ethyl undecanoate	Non-terpenoid aliphatic ester	Non-terpenoid ester
fenchone	Monoterpene ketone	Other oxygenated monoterpene
geranic acid	Monoterpene acid	Other oxygenated monoterpene
geranyl 2-methylpropanoate	Monoterpene ester	Monoterpenoid ester
geranyl hexanoate	Monoterpene ester	Monoterpenoid ester
g-terpinen-7-al	Monoterpene aldehyde	Other oxygenated monoterpene
hexalactone	Non-terpenoid aliphatic ester (lactone)	Non-terpenoid ester
hexyl 2-methylbutanoate	Non-terpenoid aliphatic ester	Non-terpenoid ester
hexyl benzoate	Non-terpenoid aromatic ester	Non-terpenoid ester
hexyl hexanoate	Non-terpenoid aliphatic ester	Non-terpenoid ester
hydroxy-b-santalene	Sesquiterpene alcohol	Sesquiterpenoid alcohol
intermedeol	Sesquiterpene alcohol	Sesquiterpenoid alcohol
isopropyl dodecanoate	Non-terpenoid aliphatic ester	Non-terpenoid ester
limonen-10-yl propanoate	Monoterpene ester	Monoterpenoid ester
limonen-5-ol	Monoterpene alcohol	Monoterpenoid alcohol
limonene-4-yl hydroperoxide	Monoterpene hydroperoxide	Other oxygenated monoterpene
linalyl isobutanoate	Monoterpene ester	Monoterpenoid ester
melonol	Non-terpenoid aliphatic alcohol	Non-terpenoid alcohol
melonyl acetate	Non-terpenoid aliphatic ester	Non-terpenoid ester
methional	Non-terpenoid sulfur compound	Other non-terpene
methyl 14-methylpentadecanoate	Non-terpenoid aliphatic ester	Non-terpenoid ester
methyl dodecanoate	Non-terpenoid aliphatic ester	Non-terpenoid ester
methyl epijasmonate	Non-terpenoid aliphatic ester	Non-terpenoid ester
methyl hexanoate	Non-terpenoid aliphatic ester	Non-terpenoid ester
methyl nerate	Monoterpene ester	Monoterpenoid ester
methyl tetradecanoate	Non-terpenoid aliphatic ester	Non-terpenoid ester
methyl undecanoate	Non-terpenoid aliphatic ester	Non-terpenoid ester
methyl-γ-tetradecalactone	Non-terpenoid aliphatic ester (lactone)	Non-terpenoid ester
methyl-γ-tridecalactone	Non-terpenoid aliphatic ester (lactone)	Non-terpenoid ester
myristicin	Non-terpenoid aromatic benzodioxole	Other non-terpene
myrtenol	Monoterpene alcohol	Monoterpenoid alcohol
neric acid	Monoterpene acid	Other oxygenated monoterpene
neryl butanoate	Monoterpene ester	Monoterpenoid ester
neryl hexanoate	Monoterpene ester	Monoterpenoid ester
nonyl propanoate	Non-terpenoid aliphatic ester	Non-terpenoid ester
norbornanol	Non-terpenoid aliphatic alcohol	Non-terpenoid alcohol
octane	Non-terpene aliphatic hydrocarbon	Non-terpenoid hydrocarbon
octyl octanoate	Non-terpenoid aliphatic ester	Non-terpenoid ester
p-cresol	Non-terpenoid aromatic alcohol	Non-terpenoid alcohol
pentadecane	Non-terpene aliphatic hydrocarbon	Non-terpenoid hydrocarbon
pentanal	Non-terpenoid aliphatic aldehyde	Non-terpenoid aldehyde
perillyl propanoate	Monoterpene ester	Monoterpenoid ester
pinocarvone	Monoterpene ketone	Other oxygenated monoterpene
piperitone epoxide	Monoterpene ketone	Other oxygenated monoterpene
p-menthane-3,8-diol	Monoterpene alcohol	Monoterpenoid alcohol
propanoic acid	Non-terpenoid aliphatic acid	Other non-terpene
propyl heptanoate	Non-terpenoid aliphatic ester	Non-terpenoid ester
rosefuran	Monoterpene furan	Other oxygenated monoterpene
rosefuran epoxide	Monoterpene furan	Other oxygenated monoterpene
safranal	Apocarotenoid	Other terpenoid
sesquicineole	Sesquiterpene epoxide	Other oxygenated sesquiterpene
syringaldehyde	Non-terpenoid aromatic alcohol	Non-terpenoid alcohol
terpinolene-4,8-epoxide	Monoterpene epoxide	Other oxygenated monoterpene
thujopsene	Monoterpene epoxide	Other oxygenated monoterpene
undecanol	Monoterpene ester	Monoterpenoid ester
undecyl acetate	Hydrocarbon sesquiterpene	Hydrocarbon sesquiterpene
vanillin	Non-terpenoid aromatic alcohol	Non-terpenoid alcohol
Z-1,2-dihydroperilla alcohol	Monoterpene alcohol	Monoterpenoid alcohol
Z-2-hexenyl acetate	Non-terpenoid aliphatic ester	Non-terpenoid ester
Z-2-pinanol	Monoterpene alcohol	Monoterpenoid alcohol
Z-3-hexenyl decanoate	Non-terpenoid aliphatic ester	Non-terpenoid ester
Z-3-hexenyl octanoate	Non-terpenoid aliphatic ester	Non-terpenoid ester
Z-4-tetradecenal	Non-terpenoid aliphatic aldehyde	Non-terpenoid aldehyde
Z-5-octenal	Non-terpenoid aliphatic aldehyde	Non-terpenoid aldehyde
Z-5-octenol	Non-terpenoid aliphatic alcohol	Non-terpenoid alcohol
Z-5-octenyl acetate	Non-terpenoid aliphatic ester	Non-terpenoid ester
Z-9-hexadecenal	Non-terpenoid aliphatic aldehyde	Non-terpenoid aldehyde
Z-limonene-8,9-epoxide	Monoterpene epoxide	Other oxygenated monoterpene
Z-rose oxide	Monoterpene ether	Other oxygenated monoterpene
α-himachalene	Hydrocarbon sesquiterpene	Hydrocarbon sesquiterpene
β-humulene	Hydrocarbon sesquiterpene	Hydrocarbon sesquiterpene
γ-butyrolactone	Non-terpenoid aliphatic ester (lactone)	Non-terpenoid ester
γ-undecalactone	Non-terpenoid aliphatic ester (lactone)	Non-terpenoid ester
